# Supplementary material for: Imidazolium end-functionalized poly(l-lactide) for efficient carbon nanotube dispersion
Source: Royal Society of Chemistry journal article supplement (doi:10.1039/c0cc00920b), 2010-01-01
Supplement: c0cc00920b.pdf [file c0cc00920b.pdf]

## Supporting information

### Imidazolium end-functionalized poly(L-lactide) for Efficient Carbon Nanotube Dispersion.

Franck Meyer,<sup>a</sup> Jean-Marie Raquez,<sup>a</sup> Olivier Coulembier,<sup>a</sup> Julien De Winter,<sup>b</sup> Pascal Gerbaux,<sup>b</sup> and Philippe Dubois<sup>\*a</sup>

*a* Laboratory of Polymeric and Composite Materials, Center of Innovation and Research in Materials and Polymers (CIRMAP), University of Mons UMONS, Place du Parc 20, 7000 Mons (Belgium)

*b* Mass Spectrometry Research Group, Centre Interdisciplinaire de Spectrométrie de Masse (CISMa), University of Mons, 20 Place du Parc, 7000 Mons (Belgium)

#### Experimental Section

**Materials.** Multi wall carbon nanotubes (MWCNTs) are Grade 7000 from Nanocyl (Belgium): (average diameter: 9.5nm; average length: 1.5 $\mu$ m; carbon purity: 90%; metal oxide: 10%). 1,8-diazabicyclo[5.4.0]undec-7-ene (DBU) was purchased from Aldrich. DBU and dried on a 4A molecular sieves. Chloroform (CHCl<sub>3</sub>, Labscan, 99%) was dried using an MBraun solvent purification system under N<sub>2</sub>. L-lactide was gratefully gifted by Purac. 1-pyrenemethanol (98%), 9-anthracenemethanol (97%), 1-methylimidazole (99%) and 11-Bromoundecanol (98%) were purchased from Aldrich.

**Instrumental.** Size exclusion chromatography (SEC) was performed in THF/NEt<sub>3</sub> (2wt%) at 35°C using a Polymer Laboratories liquid chromatograph equipped with a PL-DG802 degasser, an isocratic HPLC pump LC 1120 (flow rate = 1 mL/min), a Marathon autosampler (loop volume = 200  $\mu$ L, solution conc. = 1 mg/mL), a PLDRI refractive index detector and three columns: a PL gel 10  $\mu$ m guard column and two PL gel Mixed-B 10  $\mu$ m columns. Centrifugations were made with a HETTICH Universal 16 Centrifuge. <sup>1</sup>H NMR spectra were recorded at ambient temperature with Bruker AV500 spectrometer. Thermal gravimetric analyses (TGA) were recorded on a TA Instrument Q500 under helium. Transmission electron microscopy (TEM) was performed with a Philips CM200 with an acceleration voltage of 200 kV. MALDI mass spectra were recorded using our Waters QToF Premier mass spectrometer equipped with a nitrogen laser, operating at 337 nm with a maximum output of 500 J/m<sup>2</sup> delivered to the sample in 4 ns pulses at 20 Hz repeating rate. Time-of-flight mass

analysis were performed in the reflectron mode at a resolution of about 10 000. The matrix, trans-2-[3-(4-t-Butyl-phenyl)-2-methyl-2-propenylidene]malononitrile (DCTB), was prepared as 20 mg/mL solution in chloroform. The matrix solution (1  $\mu$ L) was applied to a stainless steel target and air dried. Polymer samples were dissolved in Chloroform to obtain 1mg/mL solutions. 1 $\mu$ L aliquots of these solutions were applied onto the target area already bearing the matrix crystals, and then air dried.

#### **Typical synthesis of PyPLLA 1, AntPLLA 2 and ImPLLA 3**

L-lactide (5.8 g, 40.3 mmol) and ionic liquid **4** (192 mg, 0.57 mmol) are stirred in 20 mL of chloroform. DBU (21  $\mu$ l, 0.15 mmol) is added and the solution is stirred at room temperature for 5 mn. Then, three drops of acetic acid are added and PLLA is precipitated in hexane. After filtration, the white powder is dried at 70°C under vacuum overnight. Yield = 95%.

**PyPLLA 1:**  $M_n$  determined by SEC (universal calibration) = 9400 g mol<sup>-1</sup>, PDI = 1.10, <sup>1</sup>H NMR (CDCl<sub>3</sub>):  $\delta$  8.15 (m, CH Arom.), 5.94 (d,  $J$  = 12.6, CHH), 5.83 (d,  $J$  = 12.6, CHHPh) 5.15 (q,  $J$  = 7.1 Hz, CH), 1.57 (d,  $J$  = 7.1 Hz, CH<sub>3</sub>).

**AntPLLA 2:**  $M_n$  determined by SEC (universal calibration) = 10100 g mol<sup>-1</sup>, PDI = 1.13, <sup>1</sup>H NMR (CDCl<sub>3</sub>):  $\delta$  8.53 (s, CH Arom.), 8.25 (d,  $J$  = 8.6 Hz, CH Arom.), 8.04 (d,  $J$  = 8.6 Hz, CH Arom.), 7.57 (t,  $J$  = 7.2 Hz, CH Arom.), 7.50 (t,  $J$  = 7.2 Hz, CH Arom.), 6.25 (d,  $J$  = 12.6, CHH), 6.13 (d,  $J$  = 12.6, CHHPh) 5.15 (q,  $J$  = 7.1 Hz, CH), 1.57 (d,  $J$  = 7.1 Hz, CH<sub>3</sub>).

**ImPLLA 3:**  $M_n$  determined by SEC (universal calibration) = 8500 g mol<sup>-1</sup>, PDI = 1.18,  $M_n$  determined by MALDIToF = 9500 g mol<sup>-1</sup>, <sup>1</sup>H NMR (CDCl<sub>3</sub>):  $\delta$  10.60 (s, CH), 7.18 (s, CH=CH), 7.16 (s, CH=CH), 5.15 (q,  $J$  = 7.1 Hz, CH), 4.28 (t,  $J$  = 7.4 Hz, OCH<sub>2</sub>), 4.09 (s, NCH<sub>3</sub>), 1.62 (m, CH<sub>2</sub>), 1.57 (d,  $J$  = 7.1 Hz, CH<sub>3</sub>), 1.30 (m, CH<sub>2</sub>).

**Synthesis of 1-(11-hydroxy-undecyl)-3-methylimidazolium bromide 4:** Methyl imidazole (2.3 mL, 29 mmol) and bromoundecanol (8 g, 31.8 mmol) are stirred in 4 mL of refluxing chloroform overnight. Then, the oily residue is washed 3 times with ether to give the ionic liquid **4** in 95% yield. <sup>1</sup>H NMR (CDCl<sub>3</sub>):  $\delta$  9.83 (1H, s, CH), 7.42 (1H, s, CH=CH), 7.37 (1H, s, CH=CH), 4.06 (2H, t,  $J$  = 7.4 Hz, OCH<sub>2</sub>), 3.83 (3H, s, NCH<sub>3</sub>), 3.28 (2H, t,  $J$  = 6.3 Hz, NCH<sub>2</sub>), 2.93 (1H, br s, OH), 1.64 (2H, m, CH<sub>2</sub>), 1.24 (2H, m, CH<sub>2</sub>), 0.96 (14H, m, CH<sub>2</sub>).

**Typical procedure for the preparation of MWCNTs dispersion with PyPLLA 1, AntPLLA 2 and ImPLLA 3 in chloroform:** 100 mg of PLLA derivative and 5 mg of MWCNTs are stirred in 10mL of chloroform overnight. Then, the mixture was centrifugated at 4000 rpm for 10 mn.

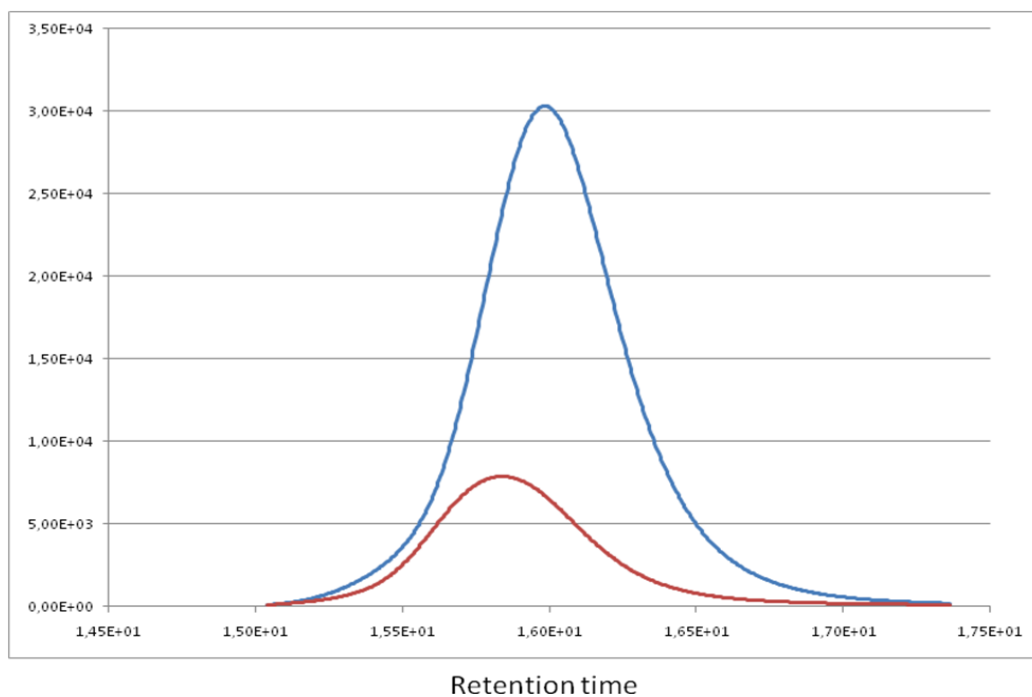

**Figure S1.** SEC traces of PyPLLA 1 showing the correlation between the molecular weight (blue) and the signal at 260 nm (red)

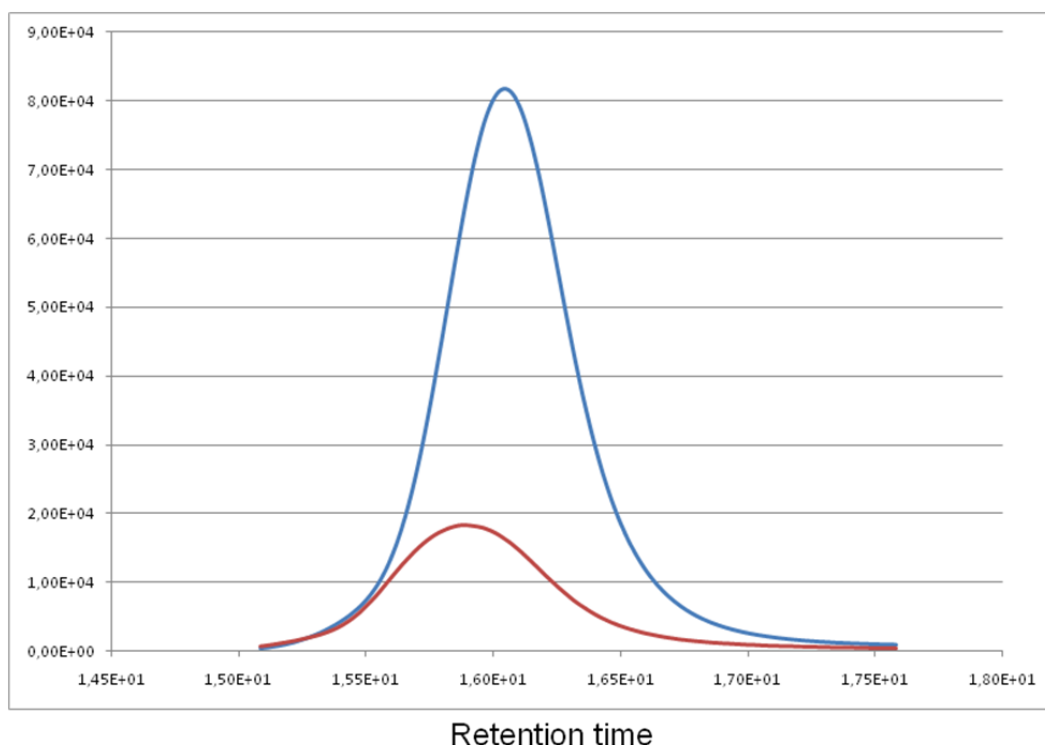

**Figure S2.** SEC traces of AntPLLA 2 showing the correlation between the molecular weight (blue) and the signal at 260 nm (red)

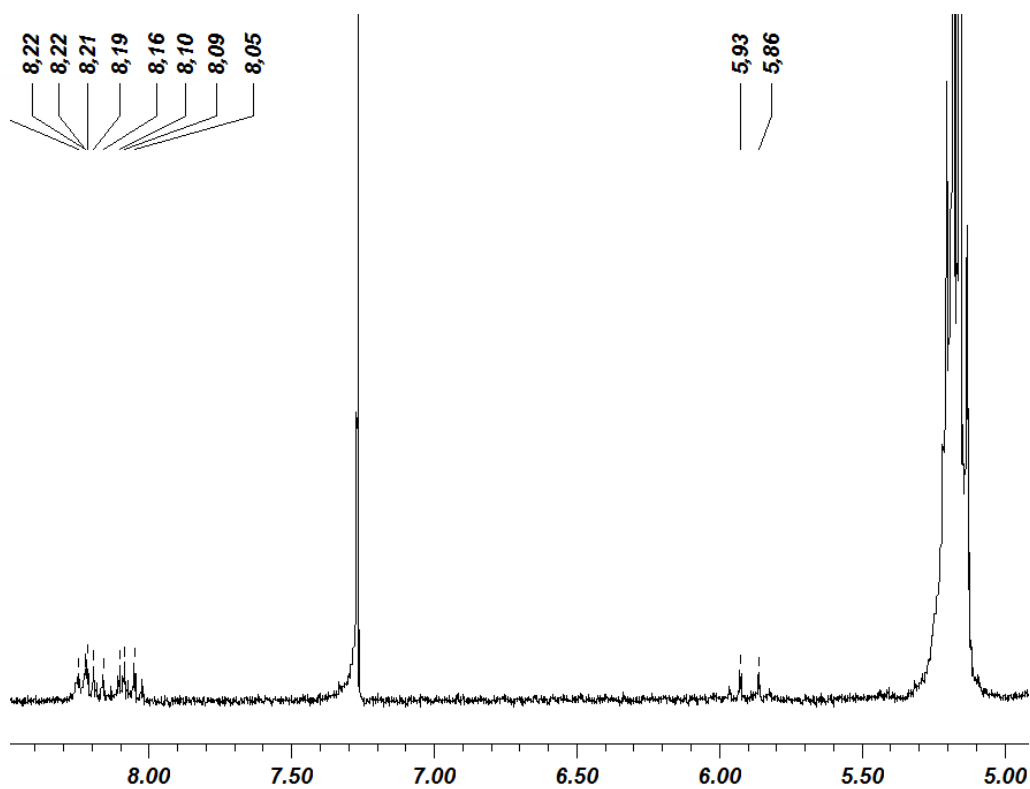

**Figure S3.**  $^1\text{H}$  NMR spectrum of PyPLLA 1 in the 5.00-8.50 ppm region revealing the presence of pyrene aromatic group

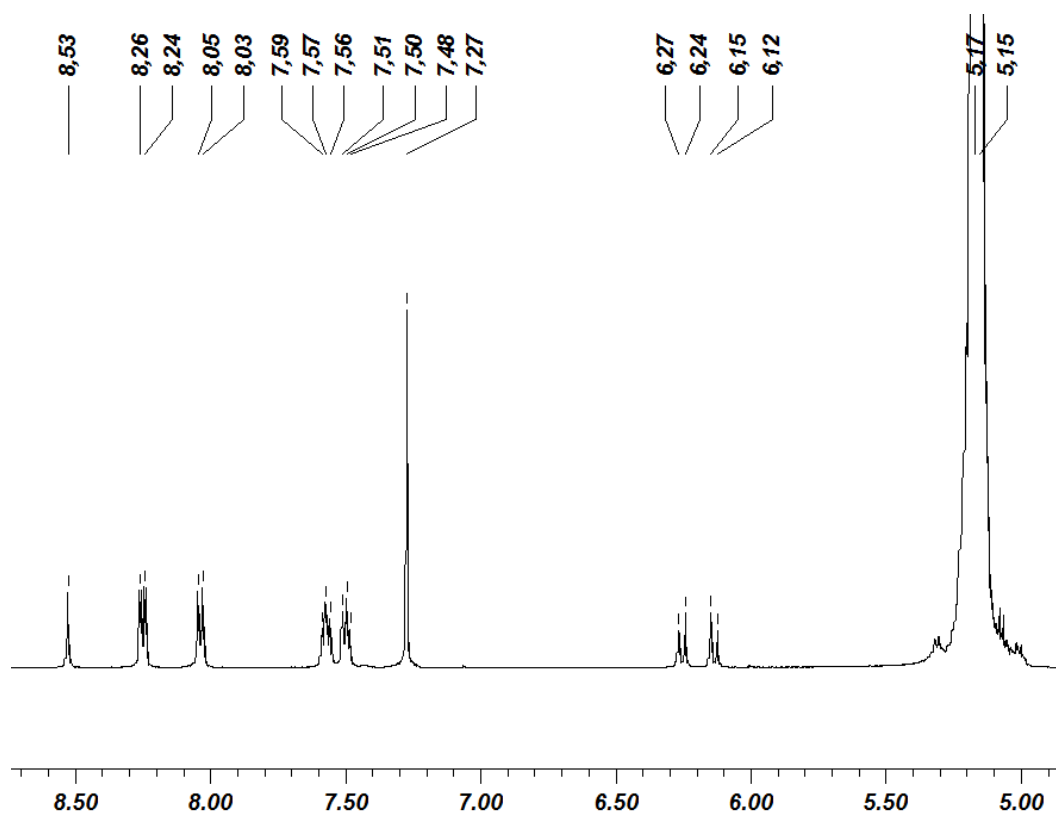

**Figure S4.**  $^1\text{H}$  NMR spectrum of AntPLLA 2 in the 4.90-8.60 ppm region revealing the presence of anthracene aromatic group

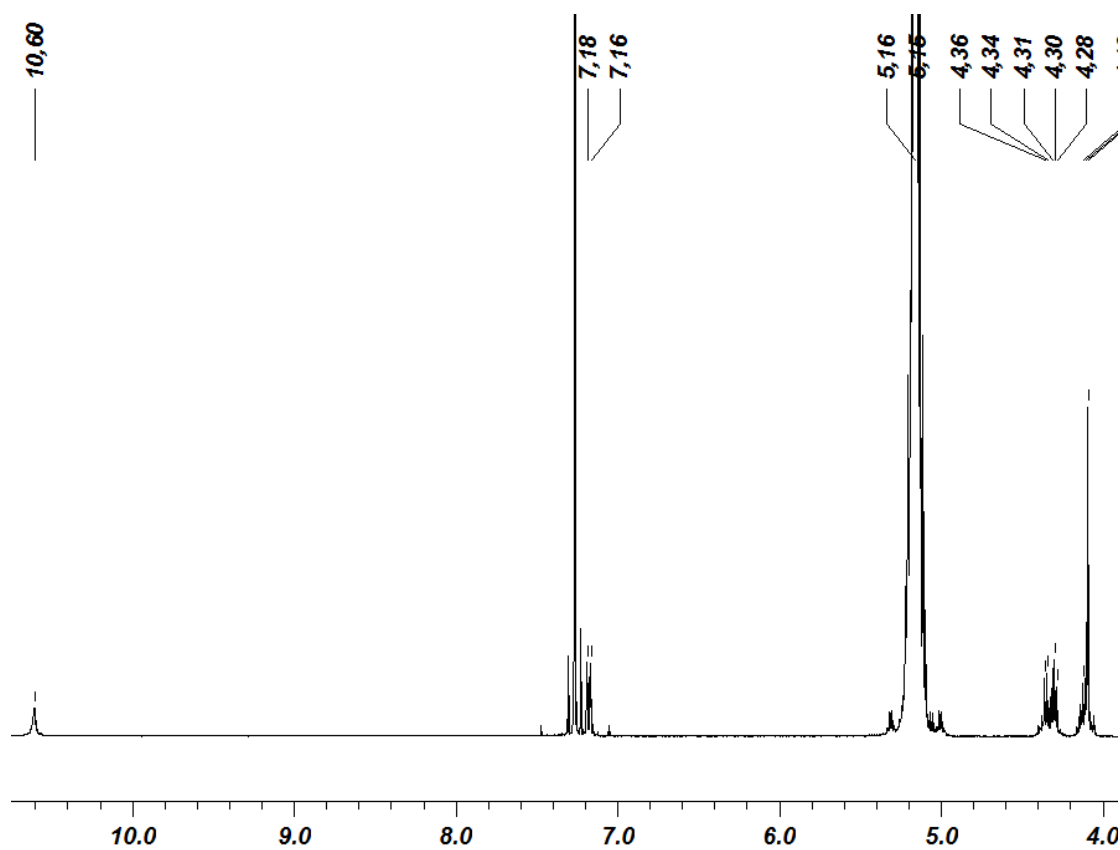

**Figure S5.** <sup>1</sup>H NMR spectrum of ImPLLA **3** in the 4.00-10.60 ppm region attesting for the presence of the imidazolium ring

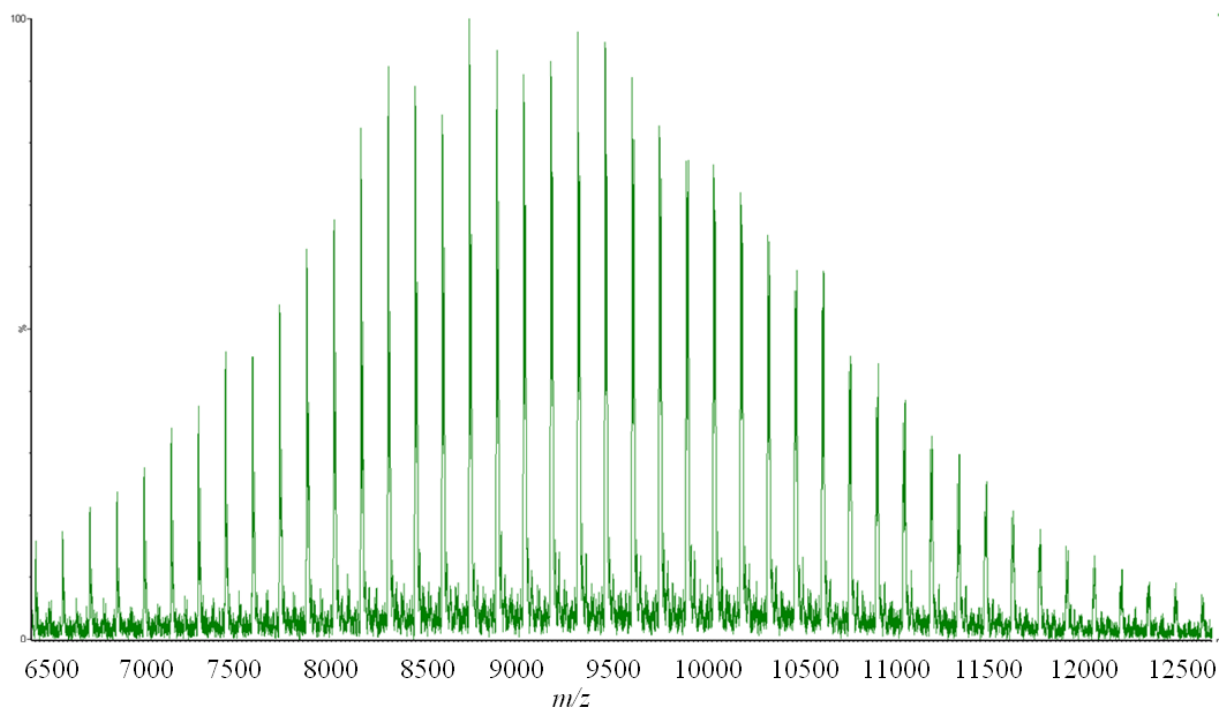

**Figure S6.** MALDI ToF spectrum of PyPLLA **1** after 30 mn

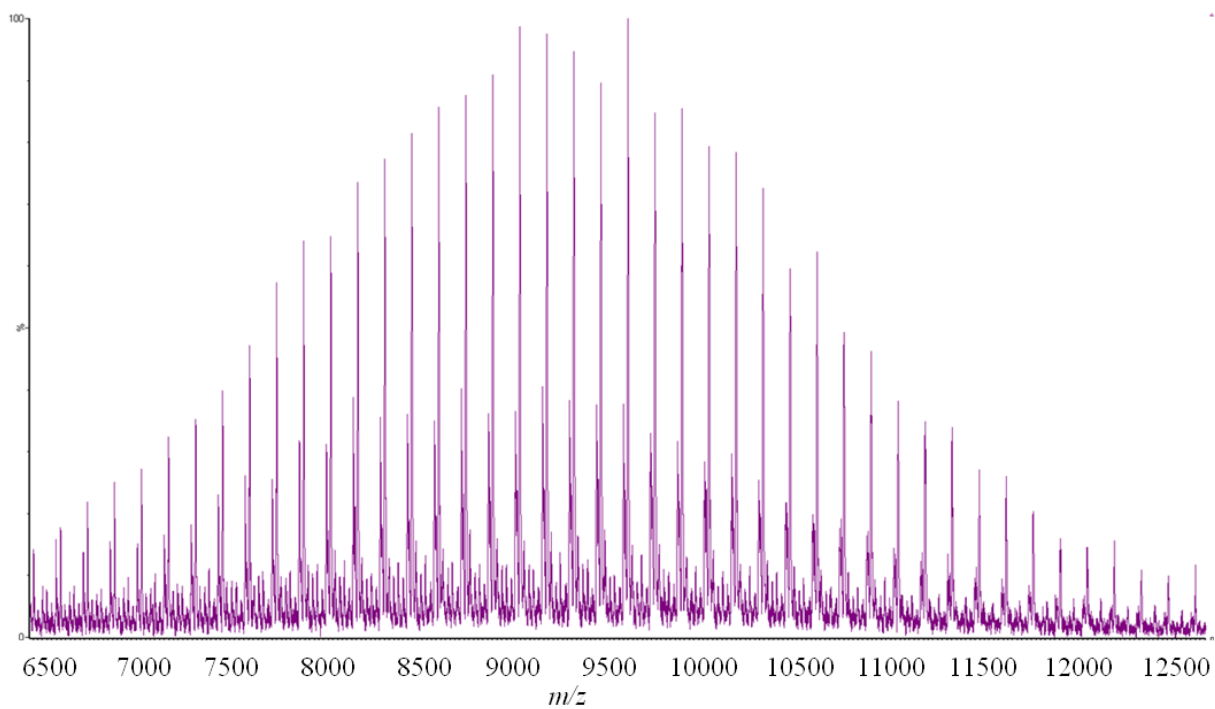

**Figure S7.** MALDI ToF spectrum of AntPLLA **2** after 30 mn

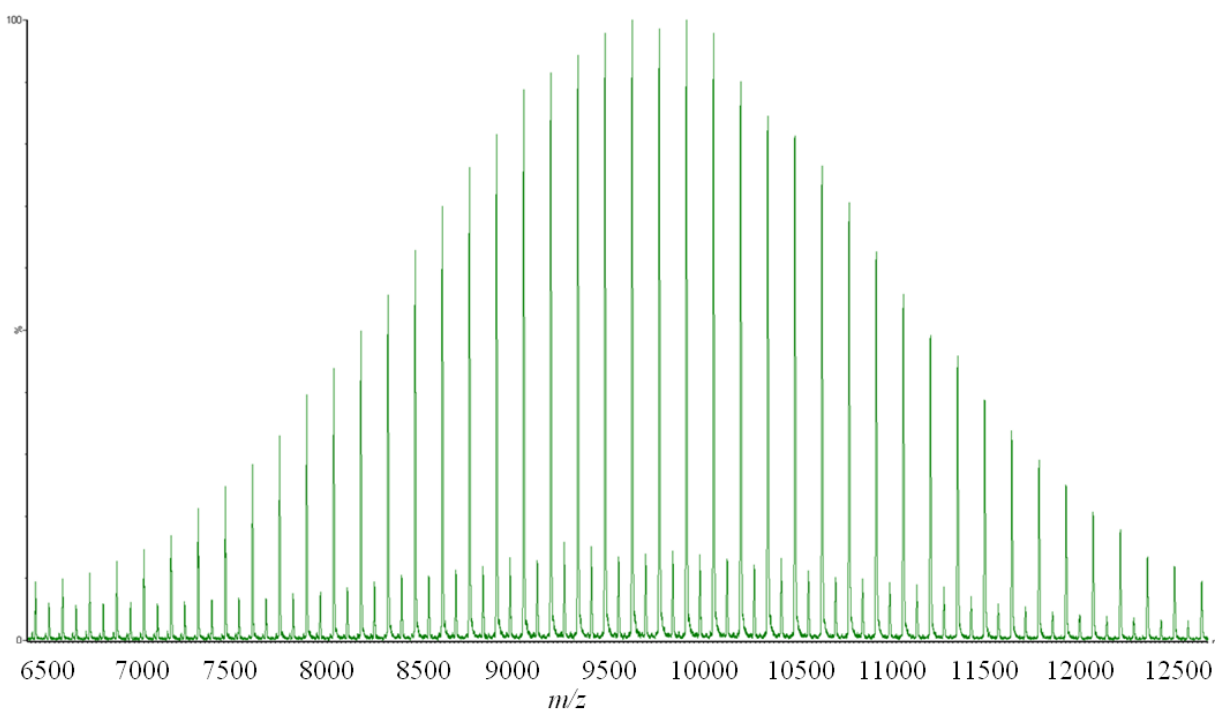

**Figure S8.** MALDI ToF spectrum of ImPLLA **3** after 10 mn

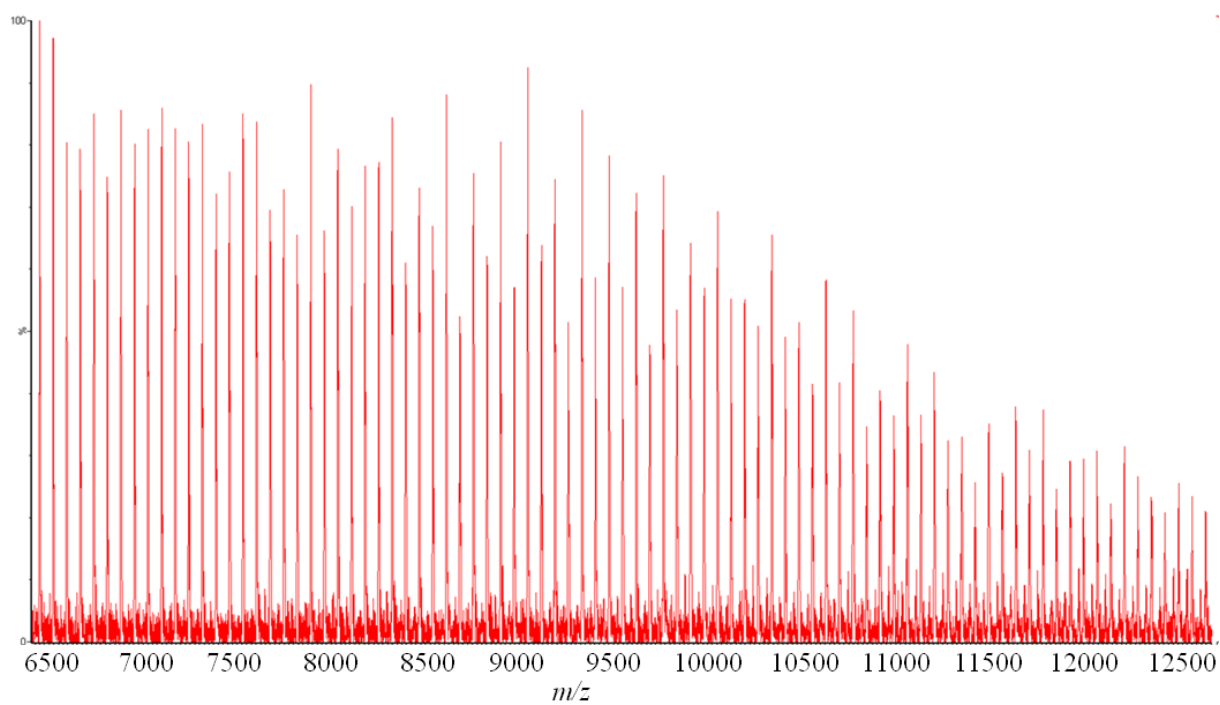

**Figure S9.** MALDI ToF spectrum of ImPLLA **3** after 20 mn
